# Supplementary material for: A new chiral diiron catalyst for enantioselective epoxidation
Source: Royal Society of Chemistry journal article supplement (doi:10.1039/b616172c), 2007-01-01

## Oxidation of t- $\beta$ -methylstyrene by peracetic acid catalyzed by complex 2

Chromatogramm of the chiral epoxides into the reaction mixture using GC chiral column lipodex E

### Chromatogram

Sample Name: C:\DATA\DATA\Carroll\methylsty01010.raw  
File Name: C:\DATA\DATA\Carroll\methylsty01010.raw  
Date: 02/11/2006 15:13:37  
Time of Injection: 08/02/2006 11:53:40  
Method:   
Start Time: 5.69 min  
End Time: 6.54 min  
Low Point: -4.92 mV  
High Point: 7.76 mV  
Plot Offset: 4.92 mV  
Plot Scale: 2.8 mV

Page 1 of 1

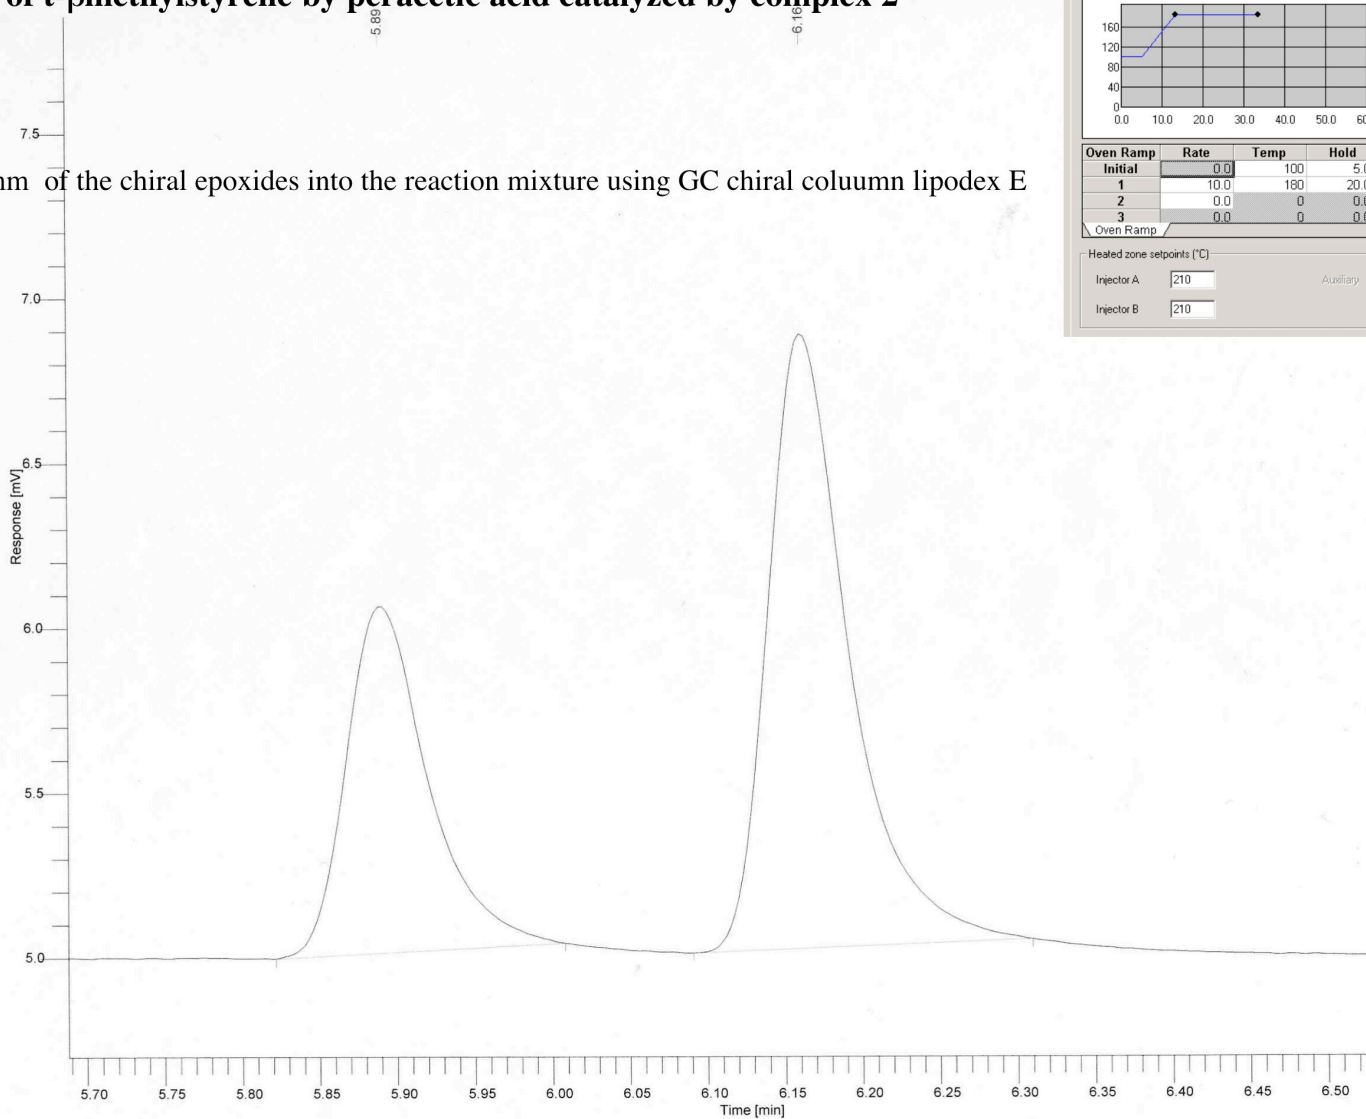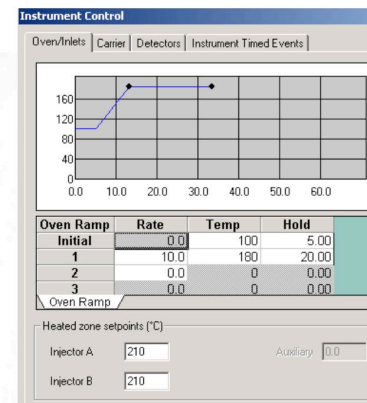

## Oxidation of methyl cinnamate by peracetic acid catalyzed by complex 2

Chromatogramm of the chiral epoxides into the reaction mixture using GC chiral column lipodex E

### Chromatogram

Sample Name : C:\DATA\DATA\cinnom\mestylencinnamb1026.raw  
File Name : C:\DATA\DATA\cinnom\mestylencinnamb1026.raw  
Date : 02/11/2006 15:11:55  
Method :  
Start Time : 21.87 min  
End Time : 28.03 min  
Plot Offset: 4.97 mV  
Time of Injection: 06/10/2006 14:07:52  
Low Point: 4.97 mV  
High Point: 5.26 mV  
Plot Scale: 0.5 mV

Page 1 of 1

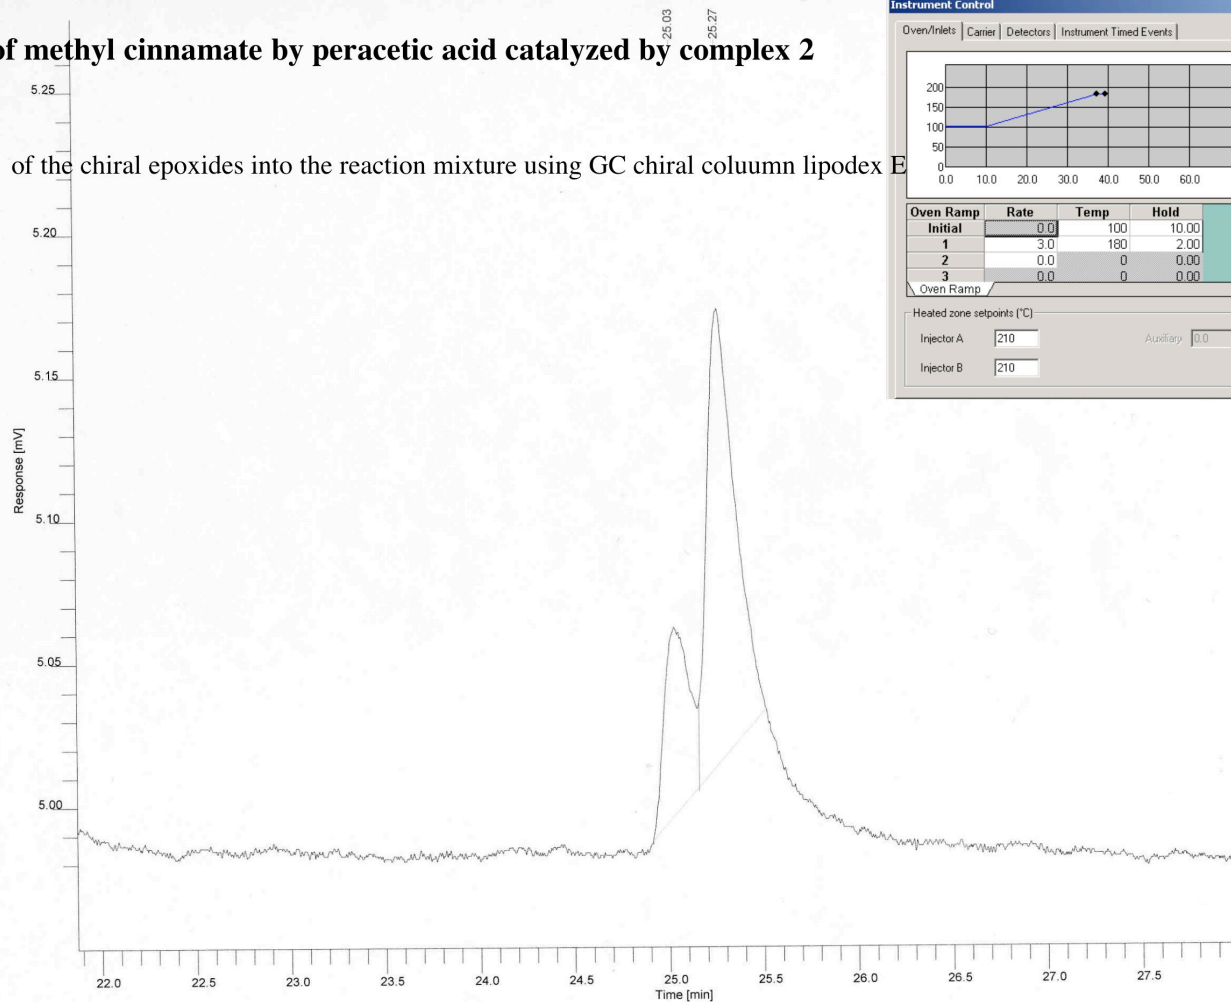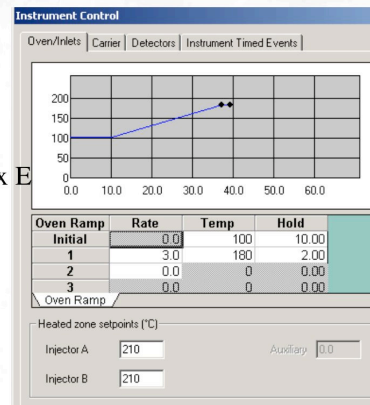

Print of window 38: Current Chromatogram(s)  
**Oxidation of t-Chalcone by peracetic acid catalyzed by complex 2**

Chromatogram of the chiral epoxides into the reaction mixture using chiral HPLC column WelO-2

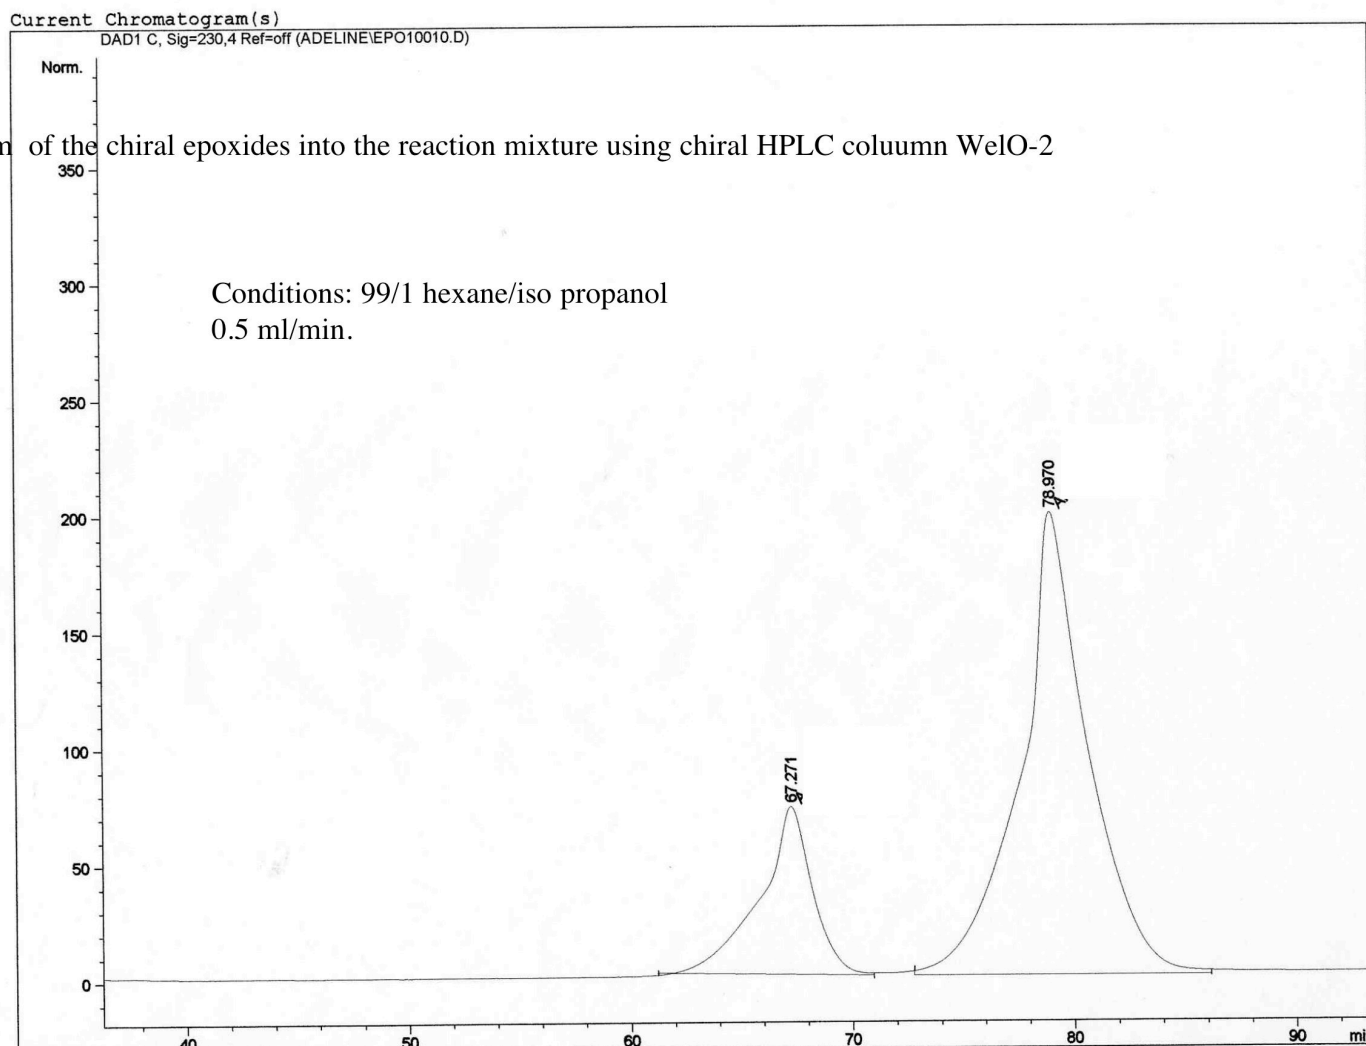

Supplement: b616172c.pdf [file b616172c.pdf]
